# Supplementary material for: Hsa_circ_0076931 suppresses malignant biological properties, down-regulates miR-6760-3p through direct binding, and up-regulates CCBE1 in glioma
Source: Oxford University Press journal article supplement (doi:10.1042/bsr20211895), 2021-12-21
Supplement: bsr-2021-1895_supp.pdf [file bsr-2021-1895_supp.pdf]

## Supplementary Materials

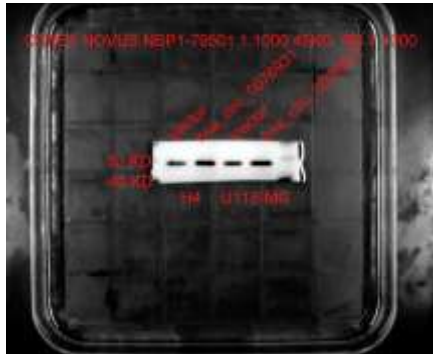

Supplementary Figure 1. The original immunoblots of CCBE1.

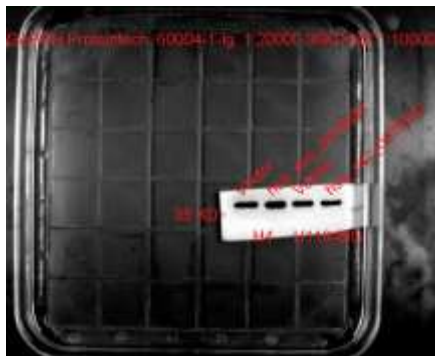

Supplementary Figure 2. The original immunoblots of GAPDH.

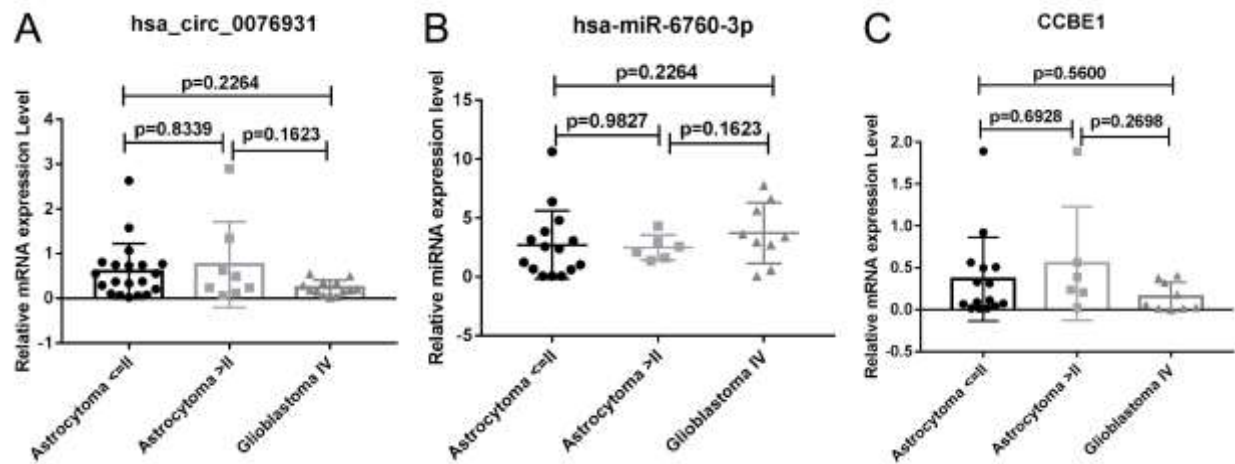

Supplementary Figure 3. The relationship between WHO grade and hsa\_circ\_0076931, miR-6760-3p, or CCBE1 in glioma. (A) hsa\_circ\_0076931, (B) miR-6760-3p, and (C) CCBE1 expression were analyzed by qRT-PCR in different grades of gliomas (Astrocytoma  $\leq$ II; Astrocytoma  $>$ II; Glioblastoma IV).
